# Supplementary material for: The importance of round-robin validation when assessing machine-learning-based vertical extrapolation of wind speeds
Source: Copernicus journal article supplement (doi:10.5194/wes-5-489-2020), 2020-04-17
Supplement: Supplementary file 1 [file wes-5-489-2020-supplement.pdf]

Supplement of Wind Energ. Sci., 5, 489–501, 2020  
<https://doi.org/10.5194/wes-5-489-2020-supplement>  
© Author(s) 2020. This work is distributed under  
the Creative Commons Attribution 4.0 License.

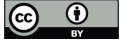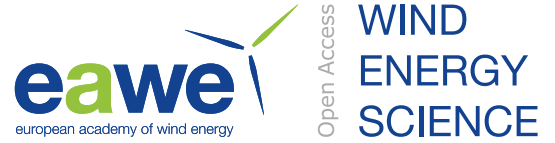

*Supplement of*

## **The importance of round-robin validation when assessing machine-learning-based vertical extrapolation of wind speeds**

**Nicola Bodini and Mike Optis**

*Correspondence to:* Nicola Bodini ([nicola.bodini@nrel.gov](mailto:nicola.bodini@nrel.gov))

The copyright of individual parts of the supplement might differ from the CC BY 4.0 License.

**Table S1:** Percentage reduction in wind-speed extrapolation MAE from the random forest approach over the power law when wind shear is calculated using data at 4 m and 65 m AGL versus at 65 m and 91 m AGL. In the latter case, wind speed at 91 m AGL is included as input feature for the random forest model.

| Error reduction relative to POWER LAW | Training - testing site |      |      |      | Average |
|---------------------------------------|-------------------------|------|------|------|---------|
|                                       | C1                      | E37  | E39  | E41  |         |
| Shear from 4 m and 65 m AGL           | -25%                    | -36% | -27% | -24% | -28%    |
| Shear from 65 m and 91 m AGL          | -15%                    | -22% | -16% | -15% | -17%    |
